# Supplementary material
Source: Springer Nature journal article supplement (https://www.springermedizin.de/resource/supplementary/12889_2009_1956_MOESM2_ESM.pdf/9485534)

**a** Age group 0-4 years

**Males**

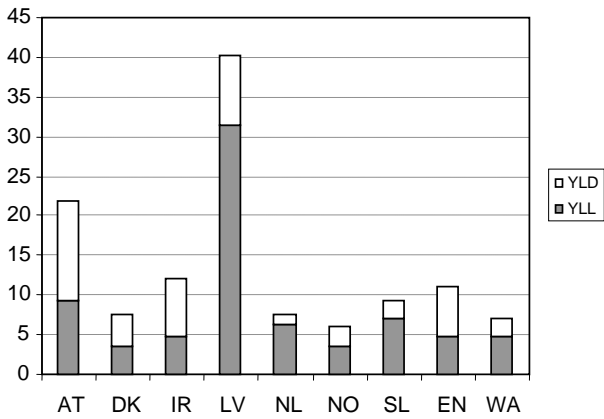

**Females**

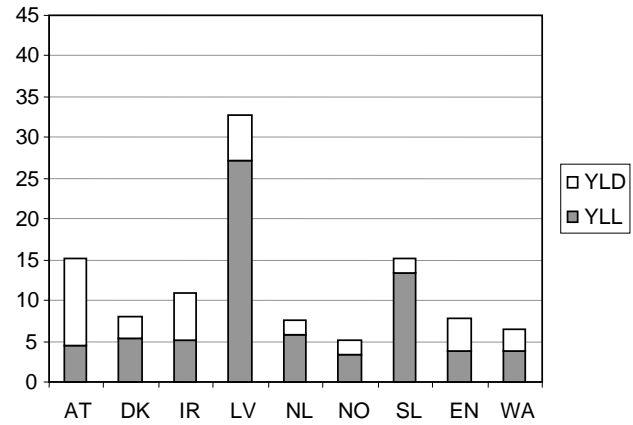

**b** Age group 5-14 years

**Males**

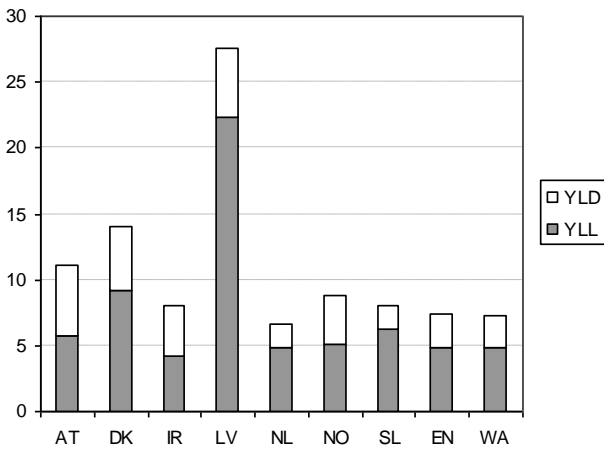

**Females**

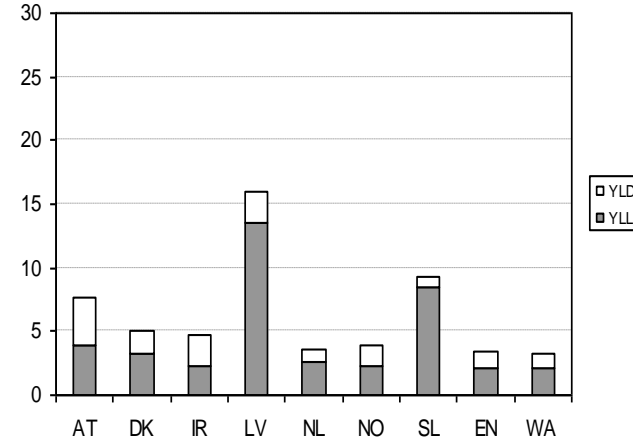

**c** Age group 15-24 years

**Males**

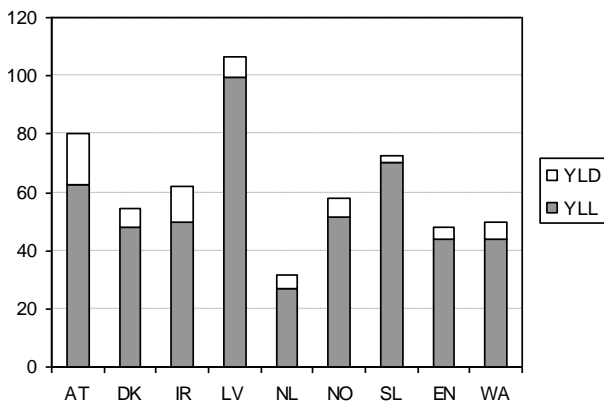

**Females**

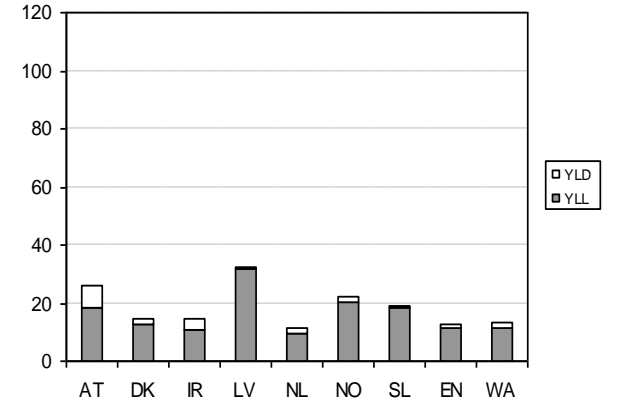

Supplement: MOESM2 [file 9485534]
